# Supplementary material for: Salix purpurea and Eleocharis obtusa Rhizospheres Harbor a Diverse Rhizospheric Bacterial Community Characterized by Hydrocarbons Degradation Potentials and Plant Growth-Promoting Properties
Source: MDPI journal article supplement (doi:10.3390/plants10101987), 2021-09-23
Supplement: s1 [file s1]

**Table S1.** Taxonomic affiliations of rhizospheric bacteria isolated from *Salix* rhizosphere on different media based on 16S rRNA gene.

| Isolate code | Phyla               | Family             | Closest NCBI relative                     | SIM (%) | Isolate code | Phyla               | Family            | Closest NCBI relative                    | SIM (%) |
|--------------|---------------------|--------------------|-------------------------------------------|---------|--------------|---------------------|-------------------|------------------------------------------|---------|
| WB1          | Betaproteobacteria  | Comamonadaceae     | <i>Variovorax paradoxus</i>               | 98      | WB41         | Actinobacteria      | Actinomycetaceae  | <i>Streptomyces phaeochromogenes</i>     | 99      |
| WB2          | Actinobacteria      | Micrococcaceae     | <i>Arthrobacter sulfonivorans</i>         | 99      | WB42         | Firmicutes          | Staphylococcaceae | <i>Staphylococcus warneri</i>            | 99      |
| WB3          | Actinobacteria      | Micrococcaceae     | <i>Arthrobacter nicotinovorans</i>        | 99      | WB43         | Actinobacteria      | Micrococcales     | <i>Phycococcus aerophilus</i>            | 98      |
| WB4          | Betaproteobacteria  | Comamonadaceae     | <i>Variovorax paradoxus</i>               | 98      | WB44         | Actinobacteria      | Actinomycetaceae  | <i>Streptomyces umbrinus</i>             | 99      |
| WB5          | Actinobacteria      | Actinomycetaceae   | <i>Streptomyces ederensis</i>             | 99      | WB45         | Actinobacteria      | Actinomycetaceae  | <i>Streptomyces umbrinus</i>             | 99      |
| WB6          | Actinobacteria      | Actinomycetaceae   | <i>Streptomyces ederensis</i>             | 99      | WB46         | Actinobacteria      | Actinomycetaceae  | <i>Nocardia asteroides</i>               | 98      |
| WB7          | Actinobacteria      | Nocardiaceae       | <i>Nocardia asteroides</i>                | 98      | WB47         | Actinobacteria      | Actinomycetaceae  | <i>Streptomyces umbrinus</i>             | 98      |
| WB8          | Betaproteobacteria  | Comamonadaceae     | <i>Variovorax paradoxus</i>               | 99      | WB48         | Actinobacteria      | Nocardiaceae      | <i>Nocardia</i> sp.                      | 98      |
| WB9          | Betaproteobacteria  | Comamonadaceae     | <i>Variovorax ureilyticus</i>             | 99      | WB49         | Actinobacteria      | Nocardioidaceae   | <i>Nocardioides alpinus</i>              | 99      |
| WB10         | Betaproteobacteria  | Comamonadaceae     | <i>Variovorax ureilyticus</i>             | 99      | WB50         | Actinobacteria      | Micrococcaceae    | <i>Arthrobacter humicola</i>             | 96      |
| WB11         | Actinobacteria      | Actinomycetaceae   | <i>Streptomyces</i> sp.                   | 99      | WB51         | Actinobacteria      | Gordoniaceae      | <i>Gordonia</i> sp.                      | 99      |
| WB12         | Betaproteobacteria  | Comamonadaceae     | <i>Variovorax paradoxus</i>               | 98      | WB52         | Actinobacteria      | Nocardioidaceae   | <i>Nocardioides albus</i>                | 98      |
| WB13         | Actinobacteria      | Micrococcaceae     | <i>Arthrobacter</i> sp.                   | 97      | WB53         | Actinobacteria      | Actinomycetaceae  | <i>Streptomyces canus</i>                | 98      |
| WB14         | Actinobacteria      | Micrococcaceae     | <i>Arthrobacter</i> sp.                   | 99      | WB54         | Actinobacteria      | Micrococcales     | <i>Phycococcus bigeumensis</i>           | 99      |
| WB15         | Betaproteobacteria  | Comamonadaceae     | <i>Variovorax boronicumulans</i>          | 98      | WB55         | Actinobacteria      | Actinomycetaceae  | <i>Streptomyces</i> sp.                  | 98      |
| WB16         | Betaproteobacteria  | Comamonadaceae     | <i>Variovorax paradoxus</i>               | 99      | WB56         | Actinobacteria      | Micrococcaceae    | <i>Pseudarthrobacter oxydans</i>         | 98      |
| WB17         | Actinobacteria      | Micrococcaceae     | <i>Arthrobacter</i> sp.                   | 97      | WB57         | Actinobacteria      | Mycobacteriaceae  | <i>Mycolicibacterium vanbaalenii</i>     | 99      |
| WB18         | Betaproteobacteria  | Comamonadaceae     | <i>Variovorax paradoxus</i>               | 98      | WB58         | Actinobacteria      | Micrococcaceae    | <i>Micromonospora palomenae</i>          | 98      |
| WB19         | Actinobacteria      | Actinomycetaceae   | <i>Streptomyces</i> sp.                   | 99      | WB59         | Actinobacteria      | Micrococcaceae    | <i>Pseudarthrobacter sulfonivorans</i>   | 98      |
| WB20         | Actinobacteria      | Nocardioidaceae    | <i>Nocardioides albus</i>                 | 99      | WB60         | Actinobacteria      | Nocardioidaceae   | <i>Nocardioides albus</i>                | 99      |
| WB21         | Actinobacteria      | Pseudonocardiaceae | <i>Amycolatopsis speibonae</i>            | 99      | WT1          | Firmicutes          | Bacillaceae       | <i>Bacillus cereus</i>                   | 99      |
| WB22         | Actinobacteria      | Micrococcaceae     | <i>Arthrobacter pascens</i>               | 98      | WT2          | Gammaproteobacteria | Pseudomonadaceae  | <i>Pseudomonas putida</i>                | 99      |
| WB23         | Betaproteobacteria  | Comamonadaceae     | <i>Variovorax paradoxus</i>               | 99      | WT3          | Firmicutes          | Paenibacillaceae  | <i>Paenibacillus polysaccharolyticus</i> | 99      |
| WB24         | Actinobacteria      | Actinomycetaceae   | <i>Streptomyces canus</i>                 | 99      | WT4          | Gammaproteobacteria | Pseudomonadaceae  | <i>Pseudomonas mandelii</i>              | 98      |
| WB25         | Alphaproteobacteria | Sphingomonadaceae  | <i>Sphingomonas sanxanigenens</i>         | 97      | WT5          | Firmicutes          | Bacillaceae       | <i>Bacillus cereus</i>                   | 99      |
| WB26         | Actinobacteria      | Actinomycetaceae   | <i>Streptomyces umbrinus</i>              | 99      | WT6          | Firmicutes          | Bacillaceae       | <i>Bacillus indicus</i>                  | 99      |
| WB27         | Actinobacteria      | Actinomycetaceae   | <i>Streptomyces phaeochromogenes</i>      | 99      | WT7          | Actinobacteria      | Actinomycetaceae  | <i>Streptomyces griseolus</i>            | 96      |
| WB28         | Actinobacteria      | Nocardioidaceae    | <i>Nocardioides albus</i>                 | 99      | WT8          | Actinobacteria      | Actinomycetaceae  | <i>Streptomyces atriruber</i>            | 97      |
| WB29         | Actinobacteria      | Actinomycetaceae   | <i>Streptomyces chartreusis</i>           | 98      | WT9          | Actinobacteria      | Micrococcaceae    | <i>Streptomyces umbrinus</i>             | 99      |
| WB30         | Actinobacteria      | Nocardioidaceae    | <i>Nocardioides albus</i>                 | 99      | WT10         | Firmicutes          | Bacillaceae       | <i>Bacillus megaterium</i>               | 99      |
| WB31         | Gammaproteobacteria | Pseudomonadaceae   | <i>Pseudomonas frederiksbergensis</i>     | 98      | WT11         | Actinobacteria      | Actinomycetaceae  | <i>Streptomyces bobili</i>               | 98      |
| WB32         | Actinobacteria      | Nocardioidaceae    | <i>Kribbella aluminosa</i>                | 98      | WT12         | Actinobacteria      | Gordoniaceae      | <i>Gordonia amicalis</i>                 | 98      |
| WB33         | Actinobacteria      | Micrococcaceae     | <i>Paenarthrobacter nitroguajacolicus</i> | 97      | WT13         | Actinobacteria      | Actinomycetaceae  | <i>Streptomyces pseudovenezuelae</i>     | 99      |
| WB34         | Actinobacteria      | Microbacteriaceae  | <i>Microbacterium oxydans</i>             | 99      | WT14         | Actinobacteria      | Actinomycetaceae  | <i>Streptomyces bobili</i>               | 98      |
| WB35         | Actinobacteria      | Nocardioidaceae    | <i>Kribbella sindirgiensis</i>            | 98      | WT15         | Firmicutes          | Bacillaceae       | <i>Bacillus aryabhatai</i>               | 99      |
| WB36         | Actinobacteria      | Micrococcaceae     | <i>Pseudarthrobacter oxydans</i>          | 98      | WT16         | Actinobacteria      | Micrococcaceae    | <i>Micromonospora halotolerans</i>       | 98      |
| WB37         | Actinobacteria      | Nocardioidaceae    | <i>Kribbella koreensis</i>                | 99      | WT17         | Gammaproteobacteria | Pseudomonadaceae  | <i>Pseudomonas kilonensis</i>            | 99      |
| WB38         | Actinobacteria      | Nocardioidaceae    | <i>Nocardioides</i> sp.                   | 98      | WT18         | Actinobacteria      | Nocardioidaceae   | <i>Nocardioides albus</i>                | 96      |
| WB39         | Actinobacteria      | Actinomycetaceae   | <i>Streptomyces umbrinus</i>              | 99      | WT19         | Actinobacteria      | Micrococcaceae    | <i>Pseudarthrobacter siccitolerans</i>   | 96      |
| WB40         | Actinobacteria      | Micrococcaceae     | <i>Pseudarthrobacter siccitolerans</i>    | 98      | WT20         | Firmicutes          | Bacillaceae       | <i>Bacillus indicus</i>                  | 99      |

**Table S1 Continued.**

| Isolate code | Phyla               | Family             | Closest NCBI relative                     | SIM (%) | Isolate code | Phyla               | Family             | Closest NCBI relative                 | SIM (%) |
|--------------|---------------------|--------------------|-------------------------------------------|---------|--------------|---------------------|--------------------|---------------------------------------|---------|
| WT21         | Alphaproteobacteria | Phyllobacteriaceae | <i>Mesorhizobium norvegicum</i>           | 98      | WT54         | Actinobacteria      | Actinomycetaceae   | <i>Streptomyces bobili</i>            | 98      |
| WT22         | Gammaproteobacteria | Pseudomonadaceae   | <i>Pseudomonas frederiksbergensis</i>     | 97      | WT55         | Actinobacteria      | Actinomycetaceae   | <i>Streptomyces bobili</i>            | 99      |
| WT23         | Actinobacteria      | Micrococcaceae     | <i>Pseudarthrobacter siccitolerans</i>    | 95      | WT56         | Gammaproteobacteria | Pseudomonadaceae   | <i>Pseudomonas frederiksbergensis</i> | 97      |
| WT24         | Actinobacteria      | Micrococcaceae     | <i>Pseudarthrobacter defluvi</i>          | 97      | WT57         | Gammaproteobacteria | Pseudomonadaceae   | <i>Pseudomonas donghuensis</i>        | 99      |
| WT25         | Firmicutes          | Bacillaceae        | <i>Bacillus simplex</i>                   | 99      | WT58         | Actinobacteria      | Nocardiaceae       | <i>Rhodococcus degradans</i>          | 99      |
| WT26         | Actinobacteria      | Actinomycetaceae   | <i>Streptomyces griseolus</i>             | 99      | WT59         | Actinobacteria      | Actinomycetaceae   | <i>Streptomyces griseolus</i>         | 99      |
| WT27         | Actinobacteria      | Actinomycetaceae   | <i>Streptomyces umbrinus</i>              | 99      | WT60         | Firmicutes          | Bacillaceae        | <i>Bacillus thuringiensis</i>         | 99      |
| WT28         | Firmicutes          | Bacillaceae        | <i>Bacillus aryabhatai</i>                | 98      | WA1          | Gammaproteobacteria | Enterobacteriaceae | <i>Raoultella terrigena</i>           | 97      |
| WT29         | Firmicutes          | Bacillaceae        | <i>Bacillus cereus</i>                    | 98      | WA2          | Gammaproteobacteria | Enterobacteriaceae | <i>Raoultella terrigena</i>           | 97      |
| WT30         | Firmicutes          | Bacillaceae        | <i>Bacillus indicus</i>                   | 98      | WA3          | Gammaproteobacteria | Enterobacteriaceae | <i>Raoultella terrigena</i>           | 97      |
| WT31         | Firmicutes          | Bacillaceae        | <i>Lysinibacillus xylanilyticus</i>       | 98      | WA4          | Gammaproteobacteria | Enterobacteriaceae | <i>Klebsiella grimontii</i>           | 97      |
| WT32         | Firmicutes          | Bacillaceae        | <i>Bacillus megaterium</i>                | 99      | WA5          | Gammaproteobacteria | Enterobacteriaceae | <i>Enterobacter cancerogenus</i>      | 98      |
| WT33         | Actinobacteria      | Micrococcaceae     | <i>Mycolicibacterium vanbaalenii</i>      | 99      | WA6          | Gammaproteobacteria | Enterobacteriaceae | <i>Klebsiella grimontii</i>           | 98      |
| WT34         | Actinobacteria      | Micrococcaceae     | <i>Pseudarthrobacter oxydans</i>          | 96      | WA7          | Gammaproteobacteria | Enterobacteriaceae | <i>Raoultella terrigena</i>           | 98      |
| WT35         | Firmicutes          | Bacillaceae        | <i>Bacillus thuringiensis</i>             | 98      | WA8          | Gammaproteobacteria | Erwiniaaceae       | <i>Pantoea</i> sp.                    | 98      |
| WT36         | Firmicutes          | Bacillaceae        | <i>Bacillus indicus</i>                   | 98      | WA9          | Gammaproteobacteria | Enterobacteriaceae | <i>Enterobacter</i> sp.               | 99      |
| WT37         | Actinobacteria      | Micrococcaceae     | <i>Arthrobacter</i> sp.                   | 98      | WA10         | Gammaproteobacteria | Enterobacteriaceae | <i>Klebsiella</i> sp.                 | 99      |
| WT38         | Actinobacteria      | Micrococcaceae     | <i>Arthrobacter</i> sp.                   | 97      | WA11         | Gammaproteobacteria | Enterobacteriaceae | <i>Raoultella terrigena</i>           | 97      |
| WT39         | Actinobacteria      | Actinomycetaceae   | <i>Streptomyces atratus</i>               | 98      | WA12         | Gammaproteobacteria | Enterobacteriaceae | <i>Klebsiella oxytoca</i>             | 99      |
| WT40         | Actinobacteria      | Micrococcaceae     | <i>Paenarthrobacter nitroguajacolicus</i> | 96      | WA13         | Gammaproteobacteria | Pseudomonadaceae   | <i>Pseudomonas donghuensis</i>        | 99      |
| WT41         | Betaproteobacteria  | Oxalobacteraceae   | <i>Massilia suwonensis</i>                | 97      | WA14         | Gammaproteobacteria | Pseudomonadaceae   | <i>Pseudomonas donghuensis</i>        | 98      |
| WT42         | Actinobacteria      | Actinomycetaceae   | <i>Streptomyces pseudovenezuelae</i>      | 98      | WA15         | Gammaproteobacteria | Xanthomonadaceae   | <i>Stenotrophomonas</i> sp.           | 96      |
| WT43         | Actinobacteria      | Actinomycetaceae   | <i>Streptomyces pseudovenezuelae</i>      | 98      | WA16         | Gammaproteobacteria | Pseudomonadaceae   | <i>Pseudomonas mosselii</i>           | 94      |
| WT44         | Firmicutes          | Bacillaceae        | <i>Bacillus simplex</i>                   | 99      | WA17         | Gammaproteobacteria | Pseudomonadaceae   | <i>Pseudomonas plecoglossicida</i>    | 98      |
| WT45         | Alphaproteobacteria | Caulobacteraceae   | <i>Caulobacter rhizosphaerae</i>          | 96      | WA18         | Gammaproteobacteria | Enterobacteriaceae | <i>Raoultella terrigena</i>           | 98      |
| WT46         | Actinobacteria      | Nocardiaceae       | <i>Rhodococcus degradans</i>              | 95      | WA19         | Gammaproteobacteria | Enterobacteriaceae | <i>Citrobacter freundii</i>           | 98      |
| WT47         | Firmicutes          | Bacillaceae        | <i>Bacillus indicus</i>                   | 99      | WA20         | Gammaproteobacteria | Enterobacteriaceae | <i>Enterobacter cancerogenus</i>      | 98      |
| WT48         | Actinobacteria      | Micrococcaceae     | <i>Arthrobacter</i> sp.                   | 98      | WA21         | Gammaproteobacteria | Pseudomonadaceae   | <i>Pseudomonas fluorescens</i>        | 99      |
| WT49         | Actinobacteria      | Gordoniaceae       | <i>Gordonia amicalis</i>                  | 99      | WA22         | Betaproteobacteria  | Comamonadaceae     | <i>Variovorax boronicumulans</i>      | 98      |
| WT50         | Gammaproteobacteria | Pseudomonadaceae   | <i>Pseudomonas frederiksbergensis</i>     | 98      | WA23         | Actinobacteria      | Pseudonocardiaceae | <i>Amycolatopsis azurea</i>           | 98      |
| WT51         | Firmicutes          | Bacillaceae        | <i>Bacillus indicus</i>                   | 99      | WA24         | Gammaproteobacteria | Pseudomonadaceae   | <i>Pseudomonas kilonensis</i>         | 99      |
| WT52         | Actinobacteria      | Actinomycetaceae   | <i>Streptomyces bobili</i>                | 98      | WA25         | Gammaproteobacteria | Pseudomonadaceae   | <i>Pseudomonas brassicacearum</i>     | 99      |
| WT53         | Actinobacteria      | Actinomycetaceae   | <i>Streptomyces bobili</i>                | 99      | WA28         | Betaproteobacteria  | Comamonadaceae     | <i>Variovorax paradoxus</i>           | 99      |

<sup>1</sup> Isolate code refers to the environmental niche and isolation medium from which the isolate came. The first letter (W) indicates that the isolate was from willow rhizosphere. The second letter indicates the isolation media used to cultivate bacterial isolates (B= Bushnell-Haas medium amended with 1 % diesel, as the sole carbon and energy source, T= One-tenth-strength Trypticase Soy Agar (TSA) medium and A= DF-ACC agar. The Isolate numbers were randomly assigned.

**Table S2.** Taxonomic affiliations of rhizospheric bacteria isolated from *Eleocharis* rhizosphere on different media based on 16S rRNA gene.

| Isolate code | Phyla               | Family            | Closest NCBI relative                   | SIM (%) | Isolate code | Phyla               | Family            | Closest NCBI relative                | SIM (%) |
|--------------|---------------------|-------------------|-----------------------------------------|---------|--------------|---------------------|-------------------|--------------------------------------|---------|
| EB1          | Gammaproteobacteria | Pseudomonadaceae  | <i>Pseudomonas helmanticensis</i>       | 99      | EB41         | Unidentified        | Unidentified      | <i>Unidentified bacterium</i>        | 98      |
| EB2          | Firmicutes          | Bacillaceae       | <i>Bacillus indicus</i>                 | 99      | EB42         | Alphaproteobacteria | Sphingomonadaceae | <i>Sphingopyxis soli</i>             | 98      |
| EB3          | Gammaproteobacteria | Pseudomonadaceae  | <i>Pseudomonas songnenensis</i>         | 98      | EB43         | Gammaproteobacteria | Pseudomonadaceae  | <i>Pseudomonas entomophila</i>       | 99      |
| EB4          | Gammaproteobacteria | Pseudomonadaceae  | <i>Pseudomonas geniculata</i>           | 98      | EB44         | Gammaproteobacteria | Pseudomonadaceae  | <i>Pseudomonas mosselii</i>          | 98      |
| EB5          | Betaproteobacteria  | Comamonadaceae    | <i>Variovorax boronicumulans</i>        | 98      | EB45         | Alphaproteobacteria | Xanthobacteraceae | <i>Azorhizobium</i> sp.              | 97      |
| EB6          | Betaproteobacteria  | Burkholderiaceae  | <i>Chitinimonas taiwanensis</i>         | 98      | EB46         | Alphaproteobacteria | Rhizobiaceae      | <i>Rhizobium petrolearium</i>        | 99      |
| EB7          | Gammaproteobacteria | Pseudomonadaceae  | <i>Pseudomonas alcaligenes</i>          | 98      | EB47         | Alphaproteobacteria | Bradyrhizobiaceae | <i>Bosea thiooxidans</i>             | 97      |
| EB8          | Actinobacteria      | Microbacteriaceae | <i>Microbacterium pumilum</i>           | 99      | EB48         | Betaproteobacteria  | Alcaligenaceae    | <i>Achromobacter spanius</i>         | 98      |
| EB9          | Gammaproteobacteria | Pseudomonadaceae  | <i>Pseudomonas mosselii</i>             | 97      | EB49         | Actinobacteria      | Nocardiaceae      | <i>Rhodococcus ruber</i>             | 98      |
| EB10         | Actinobacteria      | Actinomycetaceae  | <i>Streptomyces stelliscabiei</i>       | 99      | EB50         | Unidentified        | Unidentified      | <i>Unidentified bacterium</i>        | 98      |
| EB11         | Actinobacteria      | Microbacteriaceae | <i>Microbacterium lacus</i>             | 98      | EB51         | Alphaproteobacteria | Xanthobacteraceae | <i>Azorhizobium doebereineriae</i>   | 99      |
| EB12         | Gammaproteobacteria | Pseudomonadaceae  | <i>Pseudomonas mosselii</i>             | 97      | EB52         | Gammaproteobacteria | Pseudomonadaceae  | <i>Pseudomonas stutzeri</i>          | 98      |
| EB13         | Gammaproteobacteria | Moraxellaceae     | <i>Acinetobacter junii</i>              | 99      | EB53         | Actinobacteria      | Microbacteriaceae | <i>Microbacterium oxydans</i>        | 99      |
| EB14         | Gammaproteobacteria | Pseudomonadaceae  | <i>Pseudomonas mosselii</i>             | 96      | EB54         | Gammaproteobacteria | Pseudomonadaceae  | <i>Pseudomonas stutzeri</i>          | 98      |
| EB15         | Gammaproteobacteria | Pseudomonadaceae  | <i>Pseudomonas plecoglossicida</i>      | 99      | EB55         | Gammaproteobacteria | Pseudomonadaceae  | <i>Pseudomonas putida</i>            | 98      |
| EB16         | Gammaproteobacteria | Pseudomonadaceae  | <i>Pseudomonas plecoglossicida</i>      | 99      | EB56         | Betaproteobacteria  | Comamonadaceae    | <i>Delftia lacustris</i>             | 99      |
| EB17         | Actinobacteria      | Microbacteriaceae | <i>Microbacterium oxydans</i>           | 98      | EB57         | Actinobacteria      | Microbacteriaceae | <i>Agromyces indicus</i>             | 98      |
| EB18         | Betaproteobacteria  | Comamonadaceae    | <i>Acidovorax facilis</i>               | 98      | EB58         | Gammaproteobacteria | Xanthomonadaceae  | <i>Pseudoxanthomonas japonensis</i>  | 99      |
| EB19         | Gammaproteobacteria | Xanthomonadaceae  | <i>Dyella ginsengisoli</i>              | 98      | EB59         | Gammaproteobacteria | Pseudomonadaceae  | <i>Pseudomonas mosselii</i>          | 98      |
| EB20         | Gammaproteobacteria | Xanthomonadaceae  | <i>Stenotrophomonas nitritireducens</i> | 96      | EB60         | Gammaproteobacteria | Pseudomonadaceae  | <i>Pseudomonas silesiensis</i>       | 99      |
| EB21         | Gammaproteobacteria | Aeromonadaceae    | <i>Aeromonas salmonicida</i>            | 99      | ET1          | Betaproteobacteria  | Burkholderiaceae  | <i>Chitinimonas taiwanensis</i>      | 98      |
| EB22         | Gammaproteobacteria | Pseudomonadaceae  | <i>Pseudomonas mosselii</i>             | 97      | ET2          | Gammaproteobacteria | Xanthomonadaceae  | <i>Pseudoxanthomonas mexicana</i>    | 99      |
| EB23         | Gammaproteobacteria | Pseudomonadaceae  | <i>Pseudomonas putida</i>               | 98      | ET3          | Unidentified        | Unidentified      | <i>Unidentified bacterium</i>        | 98      |
| EB24         | Actinobacteria      | Microbacteriaceae | <i>Microbacterium lacus</i>             | 97      | ET4          | Gammaproteobacteria | Xanthomonadaceae  | <i>Pseudoxanthomonas spadix</i>      | 99      |
| EB25         | Gammaproteobacteria | Aeromonadaceae    | <i>Aeromonas salmonicida</i>            | 99      | ET5          | Actinobacteria      | Microbacteriaceae | <i>Microbacterium testaceum</i>      | 98      |
| EB26         | Gammaproteobacteria | Aeromonadaceae    | <i>Aeromonas hydrophila</i>             | 98      | ET6          | Actinobacteria      | Micrococcales     | <i>Lysinimonas</i> sp.               | 99      |
| EB27         | Actinobacteria      | Microbacteriaceae | <i>Microbacterium kitamiense</i>        | 99      | ET7          | Bacteroidetes       | Flavobacteriaceae | <i>Chryseobacterium candidae</i>     | 96      |
| EB28         | Gammaproteobacteria | Pseudomonadaceae  | <i>Pseudomonas plecoglossicida</i>      | 99      | ET8          | Alphaproteobacteria | Rhizobiaceae      | <i>Rhizobium selenitireducens</i>    | 96      |
| EB29         | Gammaproteobacteria | Aeromonadaceae    | <i>Aeromonas sobria</i>                 | 99      | ET9          | Alphaproteobacteria | Rhizobiaceae      | <i>Rhizobium rosettiformans</i>      | 98      |
| EB30         | Gammaproteobacteria | Pseudomonadaceae  | <i>Pseudomonas fluorescens</i>          | 99      | ET10         | Alphaproteobacteria | Rhizobiaceae      | <i>Rhizobium selenitireducens</i>    | 99      |
| EB31         | Gammaproteobacteria | Xanthomonadaceae  | <i>Stenotrophomonas pavanii</i>         | 98      | ET11         | Firmicutes          | Bacillaceae       | <i>Bacillus indicus</i>              | 99      |
| EB32         | Gammaproteobacteria | Pseudomonadaceae  | <i>Pseudomonas putida</i>               | 99      | ET12         | Firmicutes          | Bacillaceae       | <i>Bacillus indicus</i>              | 96      |
| EB33         | Gammaproteobacteria | Pseudomonadaceae  | <i>Pseudomonas plecoglossicida</i>      | 99      | ET13         | Firmicutes          | Bacillaceae       | <i>Bacillus indicus</i>              | 99      |
| EB34         | Gammaproteobacteria | Pseudomonadaceae  | <i>Pseudomonas fildesensis</i>          | 98      | ET14         | Gammaproteobacteria | Xanthomonadaceae  | <i>Pseudoxanthomonas spadix</i>      | 99      |
| EB35         | Betaproteobacteria  | Comamonadaceae    | <i>Comamonas odontotermitis</i>         | 99      | ET15         | Alphaproteobacteria | Sphingomonadaceae | <i>Sphingopyxis soli</i>             | 98      |
| EB36         | Gammaproteobacteria | Pseudomonadaceae  | <i>Pseudomonas plecoglossicida</i>      | 98      | ET16         | Firmicutes          | Bacillaceae       | <i>Bacillus aquimaris</i>            | 98      |
| EB37         | Actinobacteria      | Micrococcales     | <i>Lysinimonas</i> sp.                  | 99      | ET17         | Bacteroidetes       | Flavobacteriaceae | <i>Flavithiobacter cheonanensis</i>  | 99      |
| EB38         | Betaproteobacteria  | Comamonadaceae    | <i>Delftia lacustris</i>                | 99      | ET18         | Bacteroidetes       | Flavobacteriaceae | <i>Chryseobacterium elymi</i>        | 97      |
| EB39         | Actinobacteria      | Microbacteriaceae | <i>Microbacterium proteolyticum</i>     | 97      | ET19         | Actinobacteria      | Microbacteriaceae | <i>Microbacterium saccharophilum</i> | 95      |
| EB40         | Actinobacteria      | Microbacteriaceae | <i>Microbacterium saccharophilum</i>    | 98      | ET20         | Unidentified        | Unidentified      | <i>Unidentified bacterium</i>        | 97      |

**Table S2 Continued.**

| Isolate code | Phyla               | Family             | Closest NCBI relative                | SIM (%) | Isolate code | Phyla               | Family             | Closest NCBI relative                | SIM (%) |
|--------------|---------------------|--------------------|--------------------------------------|---------|--------------|---------------------|--------------------|--------------------------------------|---------|
| ET21         | Alphaproteobacteria | Sphingomonadaceae  | <i>Sphingomonas dokdonensis</i>      | 96      | ET54         | Gammaproteobacteria | Pseudomonadaceae   | <i>Pseudomonas mosselii</i>          | 99      |
| ET22         | Gammaproteobacteria | Xanthomonadaceae   | <i>Pseudoxanthomonas spadix</i>      | 98      | ET55         | Alphaproteobacteria | Bradyrhizobiaceae  | <i>Bosea thiooxidans</i>             | 98      |
| ET23         | Unidentified        | Unidentified       | <i>Unidentified bacterium</i>        | 98      | ET56         | Alphaproteobacteria | Xanthobacteraceae  | <i>Brevundimonas denitrificans</i>   | 98      |
| ET24         | Unidentified        | Unidentified       | <i>Unidentified bacterium</i>        | 98      | ET57         | Gammaproteobacteria | Pseudomonadaceae   | <i>Pseudomonas monteilii</i>         | 99      |
| ET25         | Firmicutes          | Bacillaceae        | <i>Bacillus marisflavi</i>           | 99      | ET58         | Firmicutes          | Bacillaceae        | <i>Exiguobacterium acetyllicum</i>   | 99      |
| ET26         | Unidentified        | Unidentified       | <i>Unidentified bacterium</i>        | 98      | ET59         | Firmicutes          | Bacillaceae        | <i>Exiguobacterium undae</i>         | 98      |
| ET27         | Gammaproteobacteria | Pseudomonadaceae   | <i>Pseudomonas plecoglossicida</i>   | 99      | ET60         | Gammaproteobacteria | Pseudomonadaceae   | <i>Azomonas macrocytogenes</i>       | 98      |
| ET28         | Actinobacteria      | Microbacteriaceae  | <i>Microbacterium testaceum</i>      | 97      | EA1          | Gammaproteobacteria | Enterobacteriaceae | <i>Klebsiella oxytoca</i>            | 98      |
| ET29         | Gammaproteobacteria | Xanthomonadaceae   | <i>Pseudoxanthomonas spadix</i>      | 98      | EA2          | Gammaproteobacteria | Enterobacteriaceae | <i>Klebsiella oxytoca</i>            | 98      |
| ET30         | Gammaproteobacteria | Pseudomonadaceae   | <i>Pseudomonas fildesensis</i>       | 99      | EA3          | Gammaproteobacteria | Enterobacteriaceae | <i>Klebsiella oxytoca</i>            | 99      |
| ET31         | Alphaproteobacteria | Rhodospirillaceae  | <i>Rhodospirillum</i> sp.            | 97      | EA4          | Gammaproteobacteria | Enterobacteriaceae | <i>Klebsiella oxytoca</i>            | 99      |
| ET32         | Betaproteobacteria  | Comamonadaceae     | <i>Variovorax paradoxus</i>          | 99      | EA5          | Gammaproteobacteria | Enterobacteriaceae | <i>Klebsiella oxytoca</i>            | 98      |
| ET33         | Betaproteobacteria  | Comamonadaceae     | <i>Delftia lacustris</i>             | 99      | EA6          | Gammaproteobacteria | Enterobacteriaceae | <i>Klebsiella oxytoca</i>            | 98      |
| ET34         | Actinobacteria      | Microbacteriaceae  | <i>Agromyces tropicus</i>            | 97      | EA7          | Gammaproteobacteria | Enterobacteriaceae | <i>Klebsiella variicola</i>          | 99      |
| ET35         | Actinobacteria      | Microbacteriaceae  | <i>Microbacterium oxydans</i>        | 99      | EA8          | Gammaproteobacteria | Enterobacteriaceae | <i>Klebsiella michiganensis</i>      | 97      |
| ET36         | Firmicutes          | Bacillaceae        | <i>Bacillus indicus</i>              | 99      | EA9          | Gammaproteobacteria | Enterobacteriaceae | <i>Enterobacter cancerogenus</i>     | 97      |
| ET37         | Gammaproteobacteria | Chromatiaceae      | <i>Pararheinheimera arenilitoris</i> | 97      | EA10         | Gammaproteobacteria | Enterobacteriaceae | <i>Klebsiella oxytoca</i>            | 98      |
| ET38         | Actinobacteria      | Nocardiaceae       | <i>Rhodococcus ruber</i>             | 98      | EA11         | Gammaproteobacteria | Enterobacteriaceae | <i>Klebsiella oxytoca</i>            | 98      |
| ET39         | Alphaproteobacteria | Sphingomonadaceae  | <i>Sphingopyxis soli</i>             | 96      | EA12         | Gammaproteobacteria | Enterobacteriaceae | <i>Klebsiella oxytoca</i>            | 97      |
| ET40         | Gammaproteobacteria | Pseudomonadaceae   | <i>Pseudomonas chengduensis</i>      | 97      | EA13         | Bacteroidetes       | Flavobacteriaceae  | <i>Myroides odoratimimus</i>         | 97      |
| ET41         | Gammaproteobacteria | Pseudomonadaceae   | <i>Pseudomonas mosselii</i>          | 99      | EA14         | Gammaproteobacteria | Moraxellaceae      | <i>Acinetobacter pittii</i>          | 99      |
| ET42         | Gammaproteobacteria | Pseudomonadaceae   | <i>Pseudomonas mendocina</i>         | 99      | EA15         | Gammaproteobacteria | Moraxellaceae      | <i>Acinetobacter johnsonii</i>       | 99      |
| ET43         | Gammaproteobacteria | Yersiniaceae       | <i>Serratia</i> sp.                  | 97      | EA16         | Bacteroidetes       | Flavobacteriaceae  | <i>Empedobacter tilapiae</i>         | 99      |
| ET44         | Gammaproteobacteria | Yersiniaceae       | <i>Serratia</i> sp.                  | 98      | EA17         | Gammaproteobacteria | Moraxellaceae      | <i>Acinetobacter calcoaceticus</i>   | 99      |
| ET45         | Gammaproteobacteria | Pseudomonadaceae   | <i>Pseudomonas fluorescens</i>       | 99      | EA18         | Bacteroidetes       | Flavobacteriaceae  | <i>Myroides odoratus</i>             | 98      |
| ET46         | Gammaproteobacteria | Yersiniaceae       | <i>Serratia</i> sp.                  | 97      | EA19         | Gammaproteobacteria | Enterobacteriaceae | <i>Enterobacter</i> sp.              | 97      |
| ET47         | Firmicutes          | Bacillaceae        | <i>Bacillus indicus</i>              | 99      | EA20         | Bacteroidetes       | Flavobacteriaceae  | <i>Myroides odoratimimus</i>         | 97      |
| ET48         | Gammaproteobacteria | Pseudomonadaceae   | <i>Pseudomonas mosselii</i>          | 98      | EA21         | Gammaproteobacteria | Enterobacteriaceae | <i>Pantoea agglomerans</i>           | 98      |
| ET49         | Gammaproteobacteria | Enterobacteriaceae | <i>Enterobacter cancerogenus</i>     | 98      | EA22         | Gammaproteobacteria | Pseudomonadaceae   | <i>Pseudomonas koreensis</i>         | 98      |
| ET50         | Gammaproteobacteria | Pseudomonadaceae   | <i>Pseudomonas putida</i>            | 99      | EA23         | Actinobacteria      | Mycobacteriaceae   | <i>Mycobacterium aquiterrae</i>      | 99      |
| ET51         | Gammaproteobacteria | Yersiniaceae       | <i>Serratia</i> sp.                  | 97      | EA24         | Actinobacteria      | Microbacteriaceae  | <i>Microbacterium oxydans</i>        | 99      |
| ET52         | Gammaproteobacteria | Yersiniaceae       | <i>Serratia</i> sp.                  | 98      | EA25         | Actinobacteria      | Mycobacteriaceae   | <i>Mycolicibacterium vanbaalenii</i> | 99      |
| ET53         | Gammaproteobacteria | Pseudomonadaceae   | <i>Pseudomonas mosselii</i>          | 98      | EA27         | Actinobacteria      | Mycobacteriaceae   | <i>Mycolicibacterium vanbaalenii</i> | 98      |

<sup>1</sup> Isolate code refers to the environmental niche and isolation medium from which the isolate came. The first letter (E) indicates that the isolate where from *Eleocharis* rhizosphere. The second letter indicates the isolation media used to cultivates bacterial isolates (B= Bushnell-Haas medium amended with 1 % diesel, as the sole carbon and energy source, T= One-tenth-strength Trypticase Soy Agar (TSA) medium and A= DF-ACC agar. The Isolate numbers was randomly assigned.

**Table S3.** Taxonomic affiliations of bacteria isolated from bulk soil on different media based on 16S rRNA gene.

| Isolate code | Phyla               | Family            | Closest NCBI relative                | SIM (%) | Isolate code | Phyla               | Family             | Closest NCBI relative                   | SIM (%) |
|--------------|---------------------|-------------------|--------------------------------------|---------|--------------|---------------------|--------------------|-----------------------------------------|---------|
| SB1          | Gammaproteobacteria | Moraxellaceae     | <i>Acinetobacter calcoaceticus</i>   | 99      | SB41         | Gammaproteobacteria | Moraxellaceae      | <i>Acinetobacter calcoaceticus</i>      | 99      |
| SB2          | Gammaproteobacteria | Moraxellaceae     | <i>Acinetobacter johnsonii</i>       | 99      | SB42         | Gammaproteobacteria | Pseudomonadaceae   | <i>Pseudomonas stutzeri</i>             | 96      |
| SB3          | Firmicutes          | Bacillaceae       | <i>Bacillus toyonensis</i>           | 99      | SB43         | Alphaproteobacteria | Sphingomonadaceae  | <i>Sphingomonas taxi</i>                | 99      |
| SB4          | Actinobacteria      | Microbacteriaceae | <i>Microbacterium oxydans</i>        | 97      | SB44         | Gammaproteobacteria | Pseudomonadaceae   | <i>Pseudomonas hunanensis</i>           | 98      |
| SB5          | Gammaproteobacteria | Moraxellaceae     | <i>Acinetobacter johnsonii</i>       | 98      | SB45         | Gammaproteobacteria | Pseudomonadaceae   | <i>Pseudomonas mosselii</i>             | 99      |
| SB6          | Actinobacteria      | Bogoriellaceae    | <i>Georgenia muralis</i>             | 95      | SB46         | Actinobacteria      | Microbacteriaceae  | <i>Microbacterium lacus</i>             | 98      |
| SB7          | Gammaproteobacteria | Moraxellaceae     | <i>Acinetobacter johnsonii</i>       | 99      | SB47         | Gammaproteobacteria | Xanthomonadaceae   | <i>Pseudoxanthomonas spadix</i>         | 98      |
| SB8          | Actinobacteria      | Microbacteriaceae | <i>Microbacterium lacus</i>          | 95      | SB48         | Gammaproteobacteria | Pseudomonadaceae   | <i>Pseudomonas</i> sp.                  | 99      |
| SB9          | Gammaproteobacteria | Moraxellaceae     | <i>Acinetobacter johnsonii</i>       | 99      | SB49         | Betaproteobacteria  | Oxalobacteraceae   | <i>Massilia oculi</i>                   | 98      |
| SB10         | Actinobacteria      | Nocardiaceae      | <i>Rhodococcus erythropolis</i>      | 98      | SB50         | Alphaproteobacteria | Sphingomonadaceae  | <i>Sphingobium yanoikuyae</i>           | 98      |
| SB11         | Betaproteobacteria  | Oxalobacteraceae  | <i>Massilia oculi</i>                | 99      | SB51         | Unidentified        | Unidentified       | Unidentified bacterium                  | 98      |
| SB12         | Gammaproteobacteria | Pseudomonadaceae  | <i>Pseudomonas</i> sp.               | 98      | SB52         | Unidentified        | Unidentified       | Unidentified bacterium                  | 99      |
| SB13         | Unidentified        | Unidentified      | Unidentified bacterium               | 99      | SB53         | Gammaproteobacteria | Pseudomonadaceae   | <i>Pseudomonas monteilii</i>            | 98      |
| SB14         | Actinobacteria      | Microbacteriaceae | <i>Microbacterium oxydans</i>        | 98      | SB54         | Gammaproteobacteria | Moraxellaceae      | <i>Acinetobacter calcoaceticus</i>      | 99      |
| SB15         | Gammaproteobacteria | Xanthomonadaceae  | <i>Pseudoxanthomonas spadix</i>      | 98      | SB55         | Gammaproteobacteria | Moraxellaceae      | <i>Acinetobacter calcoaceticus</i>      | 99      |
| SB16         | Gammaproteobacteria | Pseudomonadaceae  | <i>Pseudomonas putida</i>            | 98      | SB56         | Firmicutes          | Bacillaceae        | <i>Bacillus indicus</i>                 | 99      |
| SB17         | Gammaproteobacteria | Moraxellaceae     | <i>Acinetobacter calcoaceticus</i>   | 98      | SB57         | Betaproteobacteria  | Oxalobacteraceae   | <i>Massilia</i> sp.                     | 99      |
| SB18         | Actinobacteria      | Microbacteriaceae | <i>Agromyces indicus</i>             | 98      | SB58         | Gammaproteobacteria | Pseudomonadaceae   | <i>Pseudomonas stutzeri</i>             | 99      |
| SB19         | Gammaproteobacteria | Pseudomonadaceae  | <i>Pseudomonas putida</i>            | 98      | SB59         | Gammaproteobacteria | Pseudomonadaceae   | <i>Pseudomonas mosselii</i>             | 99      |
| SB20         | Gammaproteobacteria | Moraxellaceae     | <i>Acinetobacter johnsonii</i>       | 98      | SB60         | Gammaproteobacteria | Moraxellaceae      | <i>Acinetobacter</i> sp.                | 98      |
| SB21         | Unidentified        | Unidentified      | Unidentified bacterium               | 95      | ST1          | Gammaproteobacteria | Xanthomonadaceae   | <i>Stenotrophomonas nitritireducens</i> | 99      |
| SB22         | Alphaproteobacteria | Rhizobiaceae      | <i>Rhizobium</i> sp.                 | 99      | ST2          | Firmicutes          | Bacillaceae        | <i>Bacillus idriensis</i>               | 99      |
| SB23         | Unidentified        | Unidentified      | Unidentified bacterium               | 97      | ST3          | Actinobacteria      | Microbacteriaceae  | <i>Agromyces indicus</i>                | 95      |
| SB24         | Gammaproteobacteria | Xanthomonadaceae  | <i>Stenotrophomonas chelatiphaga</i> | 98      | ST4          | Actinobacteria      | Nocardiaceae       | <i>Rhodococcus ruber</i>                | 97      |
| SB25         | Firmicutes          | Bacillaceae       | <i>Bacillus siamensis</i>            | 99      | ST5          | Betaproteobacteria  | Oxalobacteraceae   | <i>Massilia</i> sp.                     | 98      |
| SB26         | Alphaproteobacteria | Paracoccus        | <i>Paracoccus</i> sp.                | 99      | ST6          | Gammaproteobacteria | Chromatiaceae      | <i>Rheinheimera arenilitoris</i>        | 98      |
| SB27         | Actinobacteria      | Nocardiaceae      | <i>Rhodococcus ruber</i>             | 98      | ST7          | Actinobacteria      | Microbacteriaceae  | <i>Agromyces indicus</i>                | 96      |
| SB28         | Unidentified        | Unidentified      | Unidentified bacterium               | 99      | ST8          | Gammaproteobacteria | Xanthomonadaceae   | <i>Pseudoxanthomonas</i> sp.            | 97      |
| SB29         | Gammaproteobacteria | Pseudomonadaceae  | <i>Pseudomonas kunmingensis</i>      | 98      | ST9          | Alphaproteobacteria | Caulobacteraceae   | <i>Brevundimonas nasdae</i>             | 97      |
| SB30         | Firmicutes          | Paenibacillaceae  | <i>Brevibacillus nitrificans</i>     | 97      | ST10         | Unidentified        | Unidentified       | Unidentified bacterium                  | 98      |
| SB31         | Gammaproteobacteria | Xanthomonadaceae  | <i>Stenotrophomonas tumulicola</i>   | 99      | ST11         | Unidentified        | Unidentified       | Unidentified bacterium                  | 97      |
| SB32         | Actinobacteria      | Microbacteriaceae | <i>Microbacterium hatanonis</i>      | 98      | ST12         | Gammaproteobacteria | Xanthomonadaceae   | <i>Pseudoxanthomonas spadix</i>         | 97      |
| SB33         | Gammaproteobacteria | Moraxellaceae     | <i>Acinetobacter</i> sp.             | 98      | ST13         | Gammaproteobacteria | Xanthomonadaceae   | <i>Pseudoxanthomonas spadix</i>         | 98      |
| SB34         | Gammaproteobacteria | Moraxellaceae     | <i>Acinetobacter calcoaceticus</i>   | 99      | ST14         | Betaproteobacteria  | Comamonadaceae     | <i>Hydrogenophaga</i> sp.               | 98      |
| SB35         | Gammaproteobacteria | Moraxellaceae     | <i>Acinetobacter calcoaceticus</i>   | 99      | ST15         | Gammaproteobacteria | Pseudomonadaceae   | <i>Pseudomonas</i> sp.                  | 97      |
| SB36         | Gammaproteobacteria | Moraxellaceae     | <i>Acinetobacter pittii</i>          | 98      | ST16         | Firmicutes          | Bacillaceae        | <i>Bacillus cibi</i>                    | 99      |
| SB37         | Gammaproteobacteria | Pseudomonadaceae  | <i>Pseudomonas fulva</i>             | 99      | ST17         | Gammaproteobacteria | Rhodanobacteraceae | <i>Luteibacter jiangsuensis</i>         | 97      |
| SB38         | Gammaproteobacteria | Pseudomonadaceae  | <i>Pseudomonas stutzeri</i>          | 98      | ST18         | Gammaproteobacteria | Bacillaceae        | <i>Bacillus aquimaris</i>               | 96      |
| SB39         | Actinobacteria      | Microbacteriaceae | <i>Microbacterium oxydans</i>        | 98      | ST19         | Gammaproteobacteria | Xanthomonadaceae   | <i>Pseudoxanthomonas spadix</i>         | 97      |
| SB40         | Actinobacteria      | Microbacteriaceae | <i>Microbacterium oxydans</i>        | 98      | ST20         | Bacteroidetes       | Flavobacteriaceae  | <i>Chryseobacterium halperniae</i>      | 95      |

Table S3 Continued.

| Isolate code | Phyla               | Family             | Closest NCBI relative                   | SIM (%) | Isolate code | Phyla               | Family             | Closest NCBI relative                | SIM (%) |
|--------------|---------------------|--------------------|-----------------------------------------|---------|--------------|---------------------|--------------------|--------------------------------------|---------|
| ST21         | Gammaproteobacteria | Rhodanobacteraceae | <i>Dyella ginsengisoli</i>              | 99      | ST54         | Firmicutes          | Bacillaceae        | <i>Bacillus cereus</i>               | 97      |
| ST22         | Unidentified        | Unidentified       | Unidentified                            | 98      | ST55         | Unidentified        | Unidentified       | Unidentified bacterium               | 96      |
| ST23         | Actinobacteria      | Nocardiaceae       | <i>Rhodococcus ruber</i>                | 99      | ST56         | Gammaproteobacteria | Xanthomonadaceae   | <i>Pseudoxanthomonas spadix</i>      | 98      |
| ST24         | Gammaproteobacteria | Rhodanobacteraceae | <i>Dyella ginsengisoli</i>              | 98      | ST57         | Gammaproteobacteria | Xanthomonadaceae   | <i>Pseudoxanthomonas</i> sp.         | 95      |
| ST25         | Gammaproteobacteria | Xanthomonadaceae   | <i>Stenotrophomonas nitritireducens</i> | 98      | ST58         | Gammaproteobacteria | Xanthomonadaceae   | <i>Pseudoxanthomonas spadix</i>      | 99      |
| ST26         | Actinobacteria      | Microbacteriaceae  | <i>Agrococcus</i> sp.                   | 99      | ST59         | Actinobacteria      | Nocardiaceae       | <i>Rhodococcus</i> sp.               | 95      |
| ST27         | Firmicutes          | Bacillaceae        | <i>Bacillus thuringiensis</i>           | 98      | ST60         | Gammaproteobacteria | Xanthomonadaceae   | <i>Pseudoxanthomonas</i> sp.         | 98      |
| ST28         | Unidentified        | Unidentified       | Unidentified bacterium                  | 98      | SA1          | Gammaproteobacteria | Moraxellaceae      | <i>Acinetobacter pittii</i>          | 98      |
| ST29         | Unidentified        | Unidentified       | Unidentified bacterium                  | 98      | SA2          | Gammaproteobacteria | Enterobacteriaceae | <i>Klebsiella variicola</i>          | 97      |
| ST30         | Firmicutes          | Bacillaceae        | <i>Bacillus idriensis</i>               | 99      | SA3          | Gammaproteobacteria | Enterobacteriaceae | <i>Klebsiella variicola</i>          | 97      |
| ST31         | Actinobacteria      | Microbacteriaceae  | <i>Microbacterium natoriense</i>        | 99      | SA4          | Gammaproteobacteria | Enterobacteriaceae | <i>Klebsiella variicola</i>          | 98      |
| ST32         | Unidentified        | Unidentified       | Unidentified bacterium                  | 98      | SA5          | Gammaproteobacteria | Enterobacteriaceae | <i>Klebsiella variicola</i>          | 97      |
| ST33         | Firmicutes          | Bacillaceae        | <i>Bacillus aryabhattai</i>             | 99      | SA6          | Gammaproteobacteria | Enterobacteriaceae | <i>Citrobacter freundii</i>          | 98      |
| ST34         | Actinobacteria      | Nocardiaceae       | <i>Rhodococcus erythropolis</i>         | 99      | SA7          | Gammaproteobacteria | Enterobacteriaceae | <i>Pantoea agglomerans</i>           | 96      |
| ST35         | Alphaproteobacteria | Caulobacteraceae   | <i>Brevundimonas alba</i>               | 99      | SA8          | Gammaproteobacteria | Enterobacteriaceae | <i>Klebsiella oxytoca</i>            | 98      |
| ST36         | Unidentified        | Unidentified       | Unidentified bacterium                  | 96      | SA9          | Gammaproteobacteria | Pseudomonadaceae   | <i>Pseudomonas plecoglossicida</i>   | 98      |
| ST37         | Actinobacteria      | Microbacteriaceae  | <i>Microbacterium</i> sp.               | 99      | SA10         | Gammaproteobacteria | Enterobacteriaceae | <i>Enterobacter</i> sp.              | 98      |
| ST38         | Firmicutes          | Bacillaceae        | <i>Bacillus aquimaris</i>               | 98      | SA11         | Gammaproteobacteria | Enterobacteriaceae | <i>Klebsiella variicola</i>          | 99      |
| ST39         | Gammaproteobacteria | Xanthomonadaceae   | <i>Stenotrophomonas nitritireducens</i> | 97      | SA12         | Gammaproteobacteria | Enterobacteriaceae | <i>Klebsiella variicola</i>          | 99      |
| ST40         | Firmicutes          | Bacillaceae        | <i>Exiguobacterium</i> sp.              | 98      | SA13         | Bacteroidetes       | Flavobacteriaceae  | <i>Empedobacter tilapiae</i>         | 99      |
| ST41         | Bacteroidetes       | Flavobacteriaceae  | <i>Chryseobacterium elymi</i>           | 96      | SA14         | Alphaproteobacteria | Sphingomonadaceae  | <i>Sphingobacterium</i> sp.          | 98      |
| ST42         | Firmicutes          | Bacillaceae        | <i>Bacillus megaterium</i>              | 99      | SA15         | Gammaproteobacteria | Xanthomonadaceae   | <i>Stenotrophomonas maltophilia</i>  | 97      |
| ST43         | Gammaproteobacteria | Chromatiaceae      | <i>Rheinheimera arenilitoris</i>        | 96      | SA16         | Bacteroidetes       | Flavobacteriaceae  | <i>Myroides odoratus</i>             | 98      |
| ST44         | Gammaproteobacteria | Xanthomonadaceae   | <i>Stenotrophomonas</i> sp.             | 99      | SA17         | Bacteroidetes       | Flavobacteriaceae  | <i>Myroides odoratus</i>             | 98      |
| ST45         | Actinobacteria      | Gordoniaceae       | <i>Gordonia amicalis</i>                | 99      | SA18         | Bacteroidetes       | Flavobacteriaceae  | <i>Empedobacter tilapiae</i>         | 99      |
| ST46         | Bacteroidetes       | Flavobacteriaceae  | <i>Chryseobacterium elymi</i>           | 97      | SA19         | Gammaproteobacteria | Enterobacteriaceae | <i>Citrobacter freundii</i>          | 98      |
| ST47         | Gammaproteobacteria | Rhodanobacteraceae | <i>Dyella ginsengisoli</i>              | 99      | SA20         | Gammaproteobacteria | Xanthomonadaceae   | <i>Stenotrophomonas maltophilia</i>  | 99      |
| ST48         | Gammaproteobacteria | Xanthomonadaceae   | <i>Pseudoxanthomonas spadix</i>         | 99      | SA21         | Firmicutes          | Staphylococcaceae  | <i>Staphylococcus capitis</i>        | 99      |
| ST49         | Gammaproteobacteria | Pseudomonadaceae   | <i>Pseudomonas alcaligenes</i>          | 97      | SA22         | Actinobacteria      | Mycobacteriaceae   | <i>Mycolicibacterium vanbaalenii</i> | 99      |
| ST50         | Gammaproteobacteria | Pseudomonadaceae   | <i>Pseudoxanthomonas spadix</i>         | 99      | SA23         | Actinobacteria      | Nocardiaceae       | <i>Rhodococcus ruber</i>             | 97      |
| ST51         | Firmicutes          | Bacillaceae        | <i>Bacillus indicus</i>                 | 99      | SA24         | Actinobacteria      | Mycobacteriaceae   | <i>Mycolicibacterium vanbaalenii</i> | 98      |
| ST52         | Alphaproteobacteria | Sphingomonadaceae  | <i>Sphingopyxis soli</i>                | 99      | SA25         | Actinobacteria      | Nocardiaceae       | <i>Rhodococcus ruber</i>             | 98      |
| ST53         | Firmicutes          | Bacillaceae        | <i>Bacillus indicus</i>                 | 99      | SA26         | Actinobacteria      | Mycobacteriaceae   | <i>Mycolicibacterium vanbaalenii</i> | 99      |

<sup>1</sup> Isolate code refers to the environmental niche and isolation medium from which the isolate came. The first letter (S) indicates that the bacterial isolate where isolated from bulk soil. The second letter indicates the isolation media used to cultivates bacterial isolates (B= Bushnell-Haas medium amended with 1 % diesel, as the sole carbon and energy source, T= One-tenth-strength Trypticase Soy Agar (TSA) medium and A= DF-ACC agar. The Isolate numbers was randomly assigned.

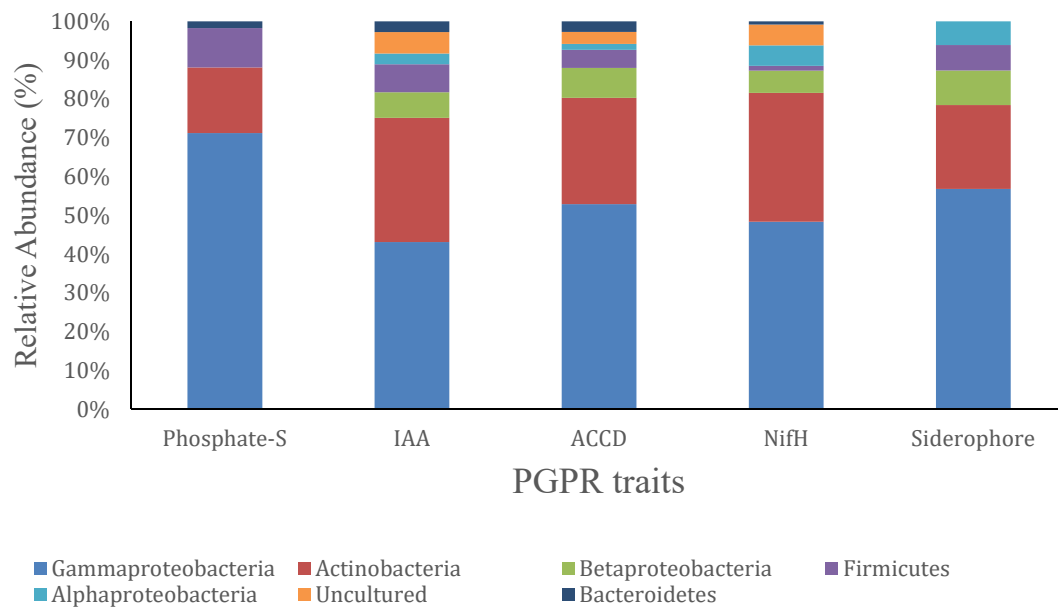

**Figure S1.** Bars indicate the relative abundance of phyla among isolates that possesses different PGP-associated traits *in vitro*.

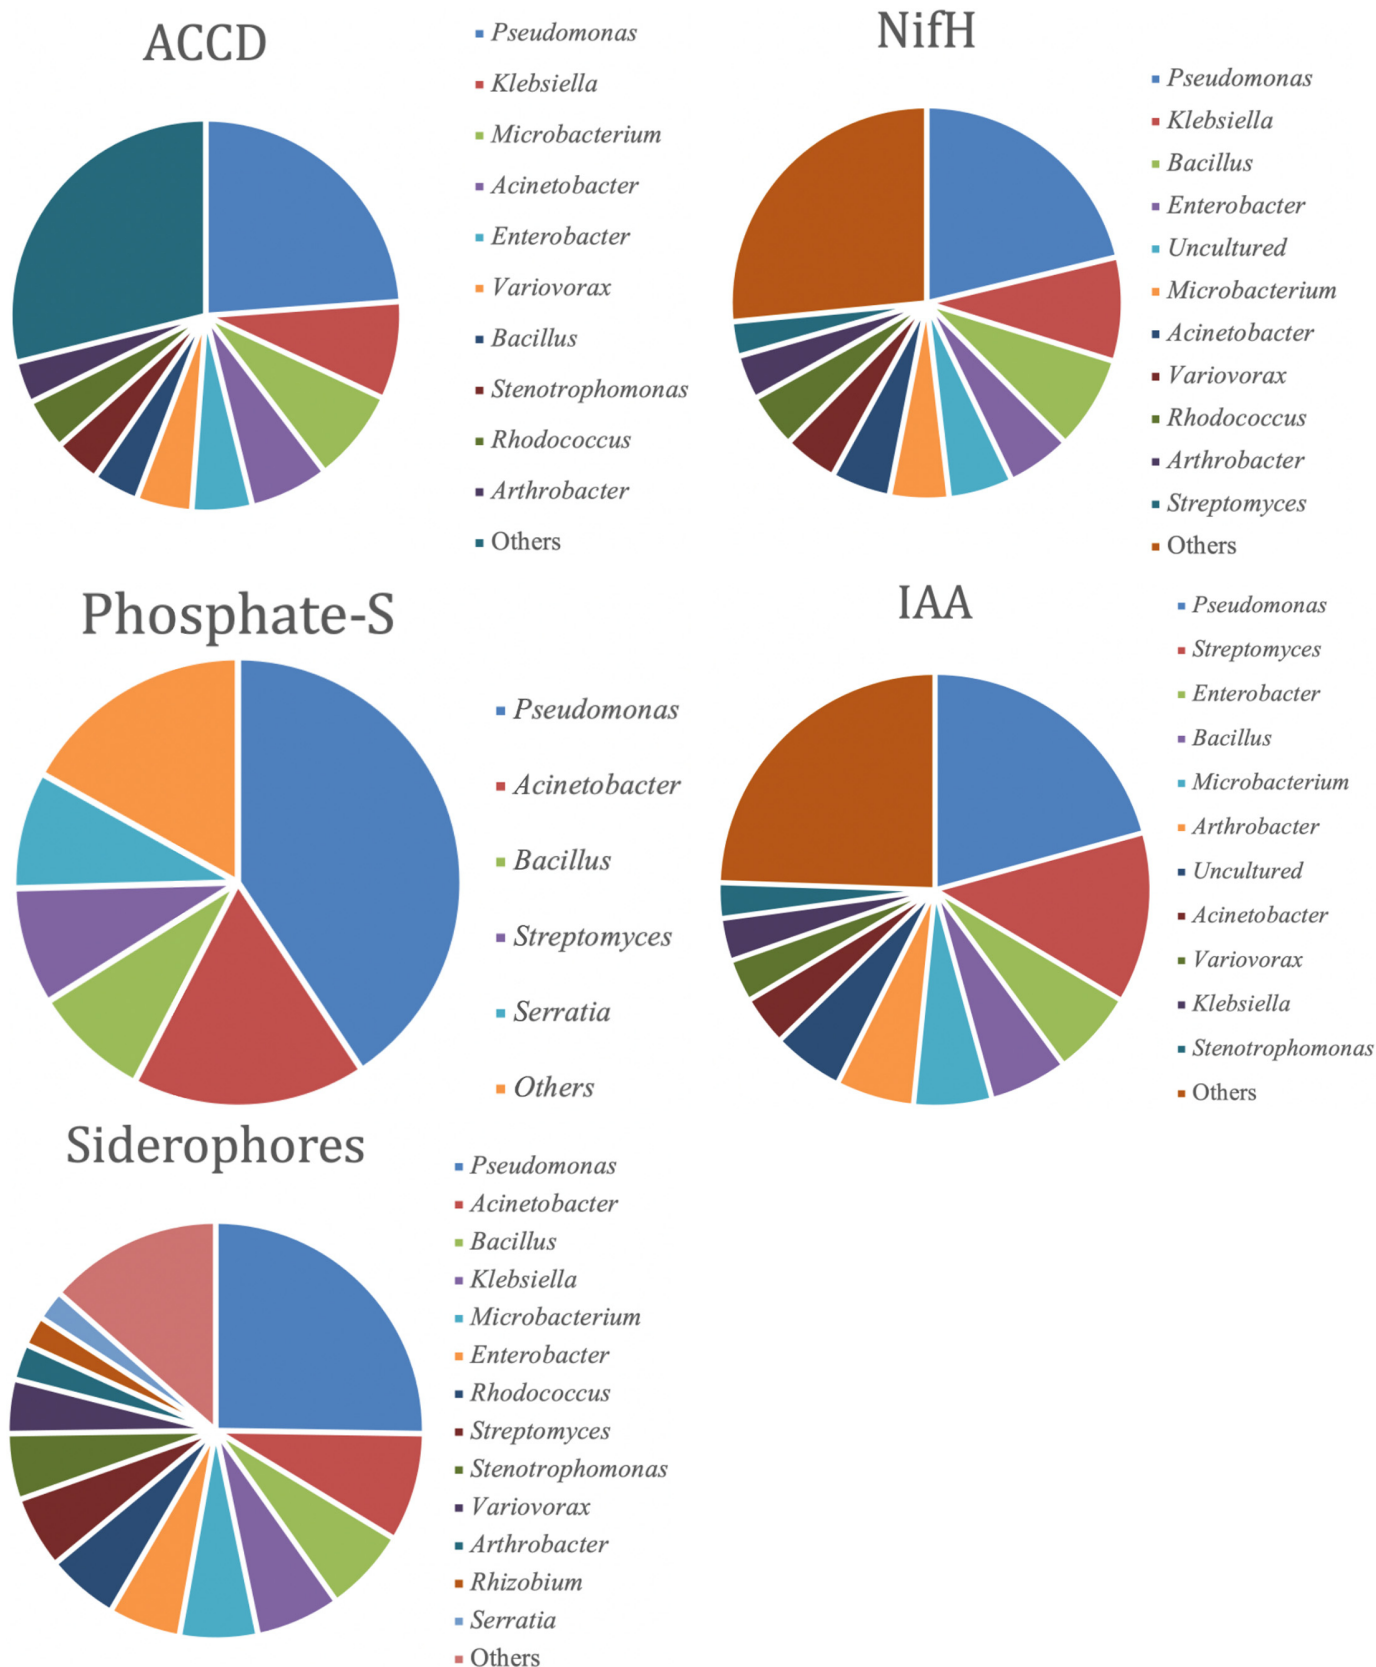

**Figure S2** Qualitative representation of genera among isolates presenting different PGP-associated traits *in vitro*.



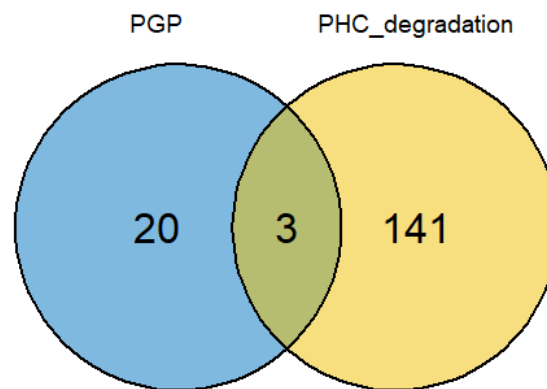

**Figure S3.** Venn diagram of comparison between isolates reported with all five PHC degradation and all five PGP traits.

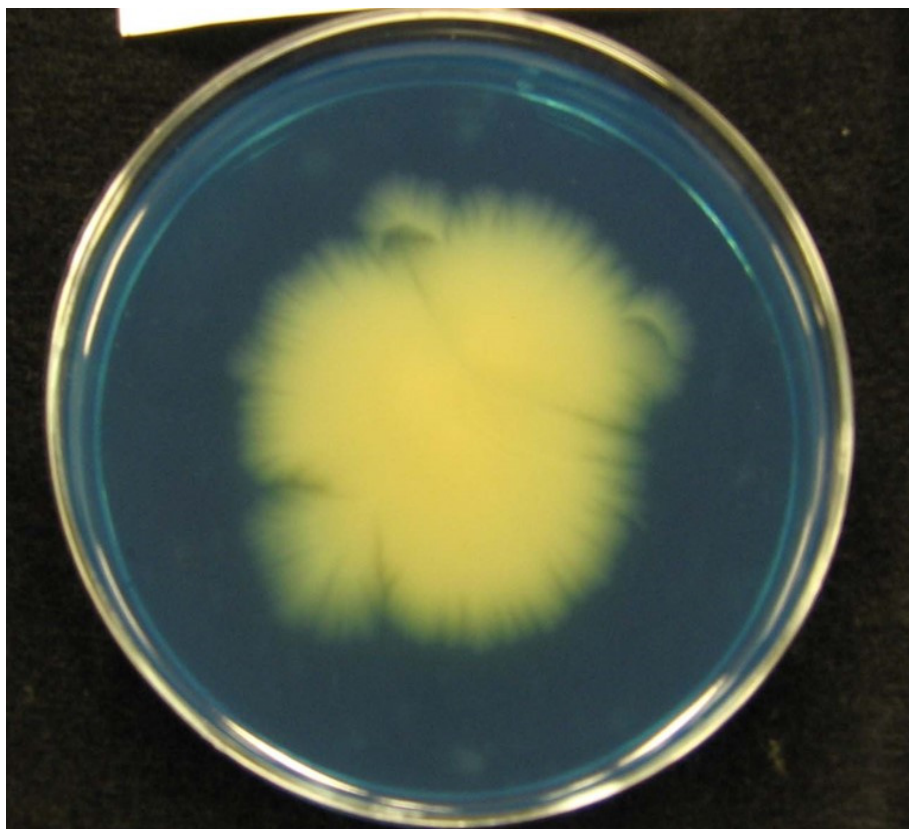

**Figure S4.** Example of production of siderophore by *Pseudomonas putida* strain ET27 on CAS agar plate.

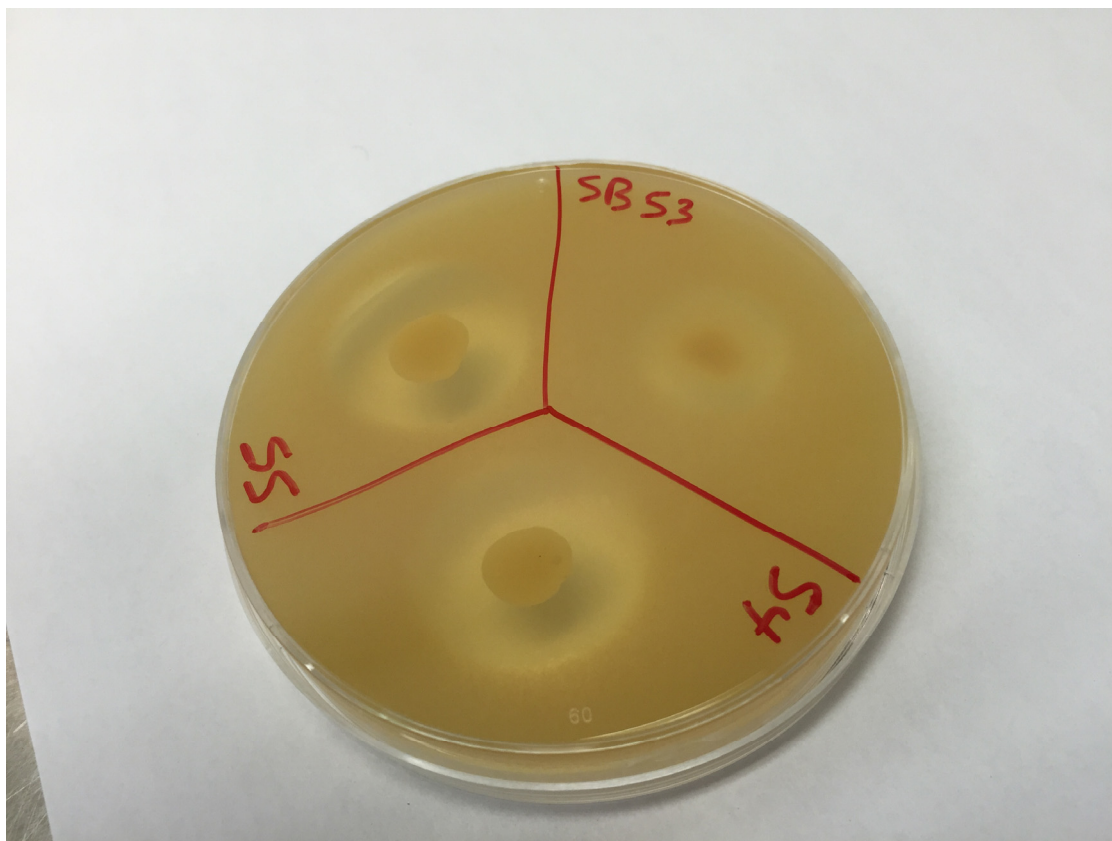

**Figure S5.** Example of phosphate solubilization by bacterial isolates *Pseudomonas monteilii* strain SB53, *Acinetobacter calcoaceticus* strain SB54 and *Bacillus indicus* strain SB55 as indicated by clear zone on the PDYA-CaP medium.
